# Supplementary material for: Changing aromatic properties through stacking: the face-to-face dimer of Ni(ii) bis(pentafluorophenyl)norcorrole
Source: Royal Society of Chemistry journal article supplement (doi:10.1039/d4cp00968a), 2024-01-01
Supplement: d4cp00968a1.pdf [file d4cp00968a1.pdf]

# Journal Name

ARTICLE TYPE

Cite this: DOI: 00.0000/xxxxxxxxxx

ELECTRONIC SUPPLEMENTARY INFORMATION

## Changing aromatic properties through stacking: the face-to-face dimer of Ni(II) bis(pentafluorophenyl)norcorrole<sup>†</sup>

Qian Wang<sup>a</sup>, Dage Sundholm<sup>a,‡</sup>, Jürgen Gauss<sup>b</sup>, Tommaso Nottoli<sup>c</sup>, Filippo Lipparini<sup>c</sup>, Shota Kino<sup>d</sup>, Shusaku Ukai<sup>d</sup>, Norihito Fukui<sup>d,e</sup>, Hiroshi Shinokubo<sup>d</sup>

Received Date

Accepted Date

DOI: 00.0000/xxxxxxxxxx

## S1 Molecular orbitals

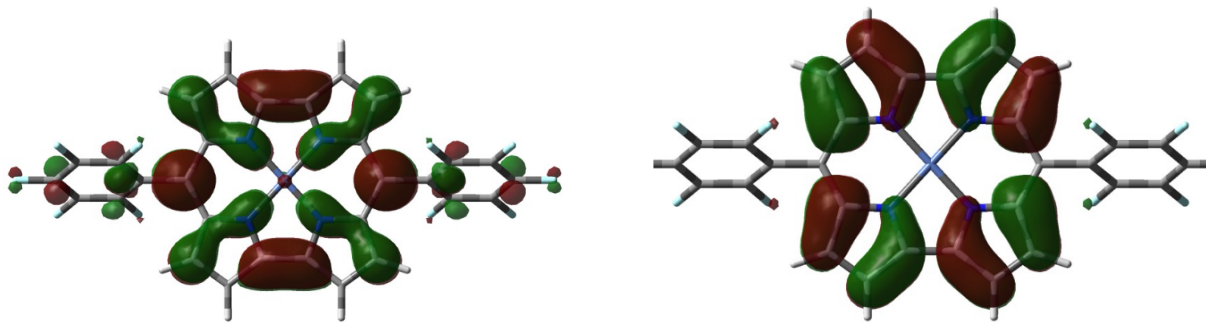

Fig. S1 The LUMO of the monomer (left) and the HOMO of the monomer (right)

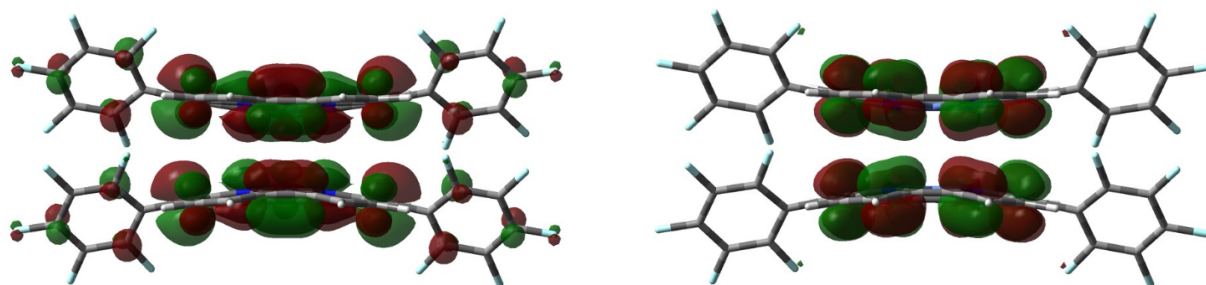

Fig. S2 The LUMO+1 of the dimer (left) and the LUMO of the dimer (right)

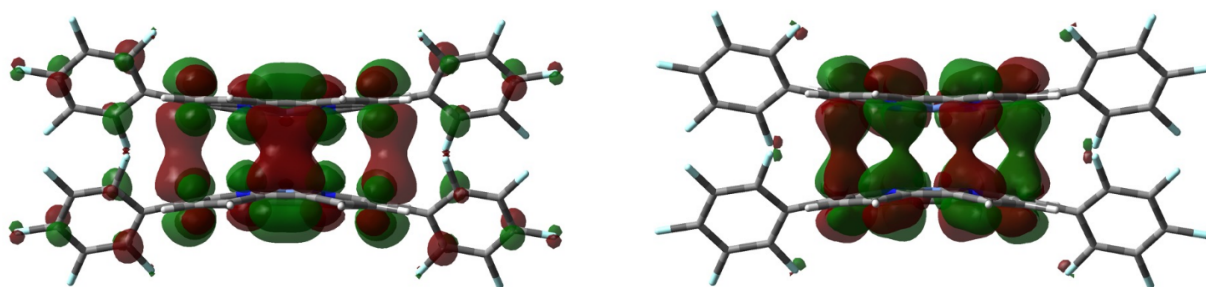

Fig. S3 The HOMO of the dimer (left) and the HOMO-1 of the dimer (right)

Table S1 Orbital energies (in eV) of the monomer and the dimer calculated at the CAM-B3LYP/def2-TZVP level as well as the irreducible representations (IRREP) of the frontier orbitals of the dimer, which belongs to the  $C_{2h}$  point group. The total energies of the monomer and dimer are -3873.90393 a.u. and -7747.83695 a.u., which yield a binding energy of 76.4 kJ/mol.

| orbital energy (eV) | Monomer | Dimer  | IRREP |
|---------------------|---------|--------|-------|
| LUMO+1              |         | -2.972 | $B_u$ |
| LUMO                | -3.047  | -3.320 | $A_u$ |
| HOMO                | -6.484  | -5.939 | $A_g$ |
| HOMO-1              |         | -6.205 | $B_g$ |

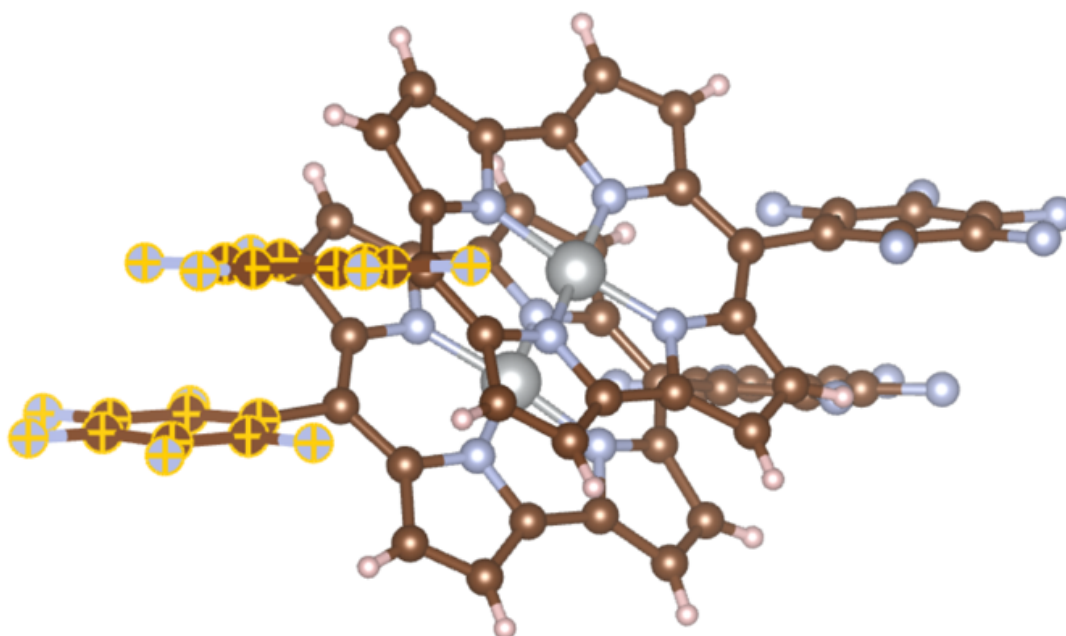

Fig. S4 The molecular structure of **1**<sub>2</sub> seen from the side, which reveals the parallel orientation of the pentafluorophenyl substituents. The brown atoms are carbon, the blue ones are nitrogen, the nickel atoms are grey, and the hydrogen are pink. Two of the pentafluorophenyl substituents are marked with yellow crosses. The picture has been made with Vesta.<sup>?</sup>

## S3 Current-density analysis

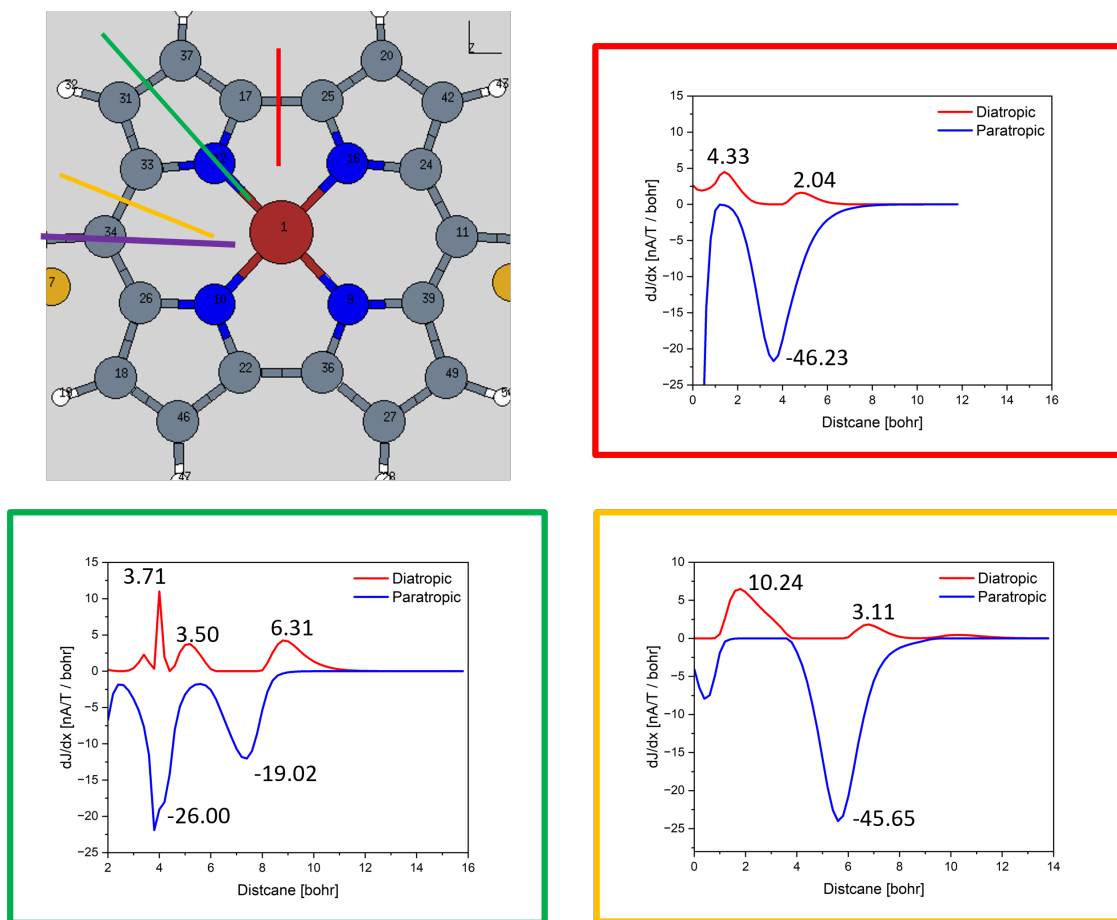

Fig. S5 The positions of the integration planes of 1 for determining the strength of the current-density pathways are shown with the colored lines in the upper-left picture. The current density is calculated at the CAM-B3LYP/def2-TZVP level. The three other pictures show the calculated ring-current profiles. The color of the frame around them matches the color of the integration plane in the upper left picture. The pictures have been made with Origin<sup>2</sup> and PowerPoint.

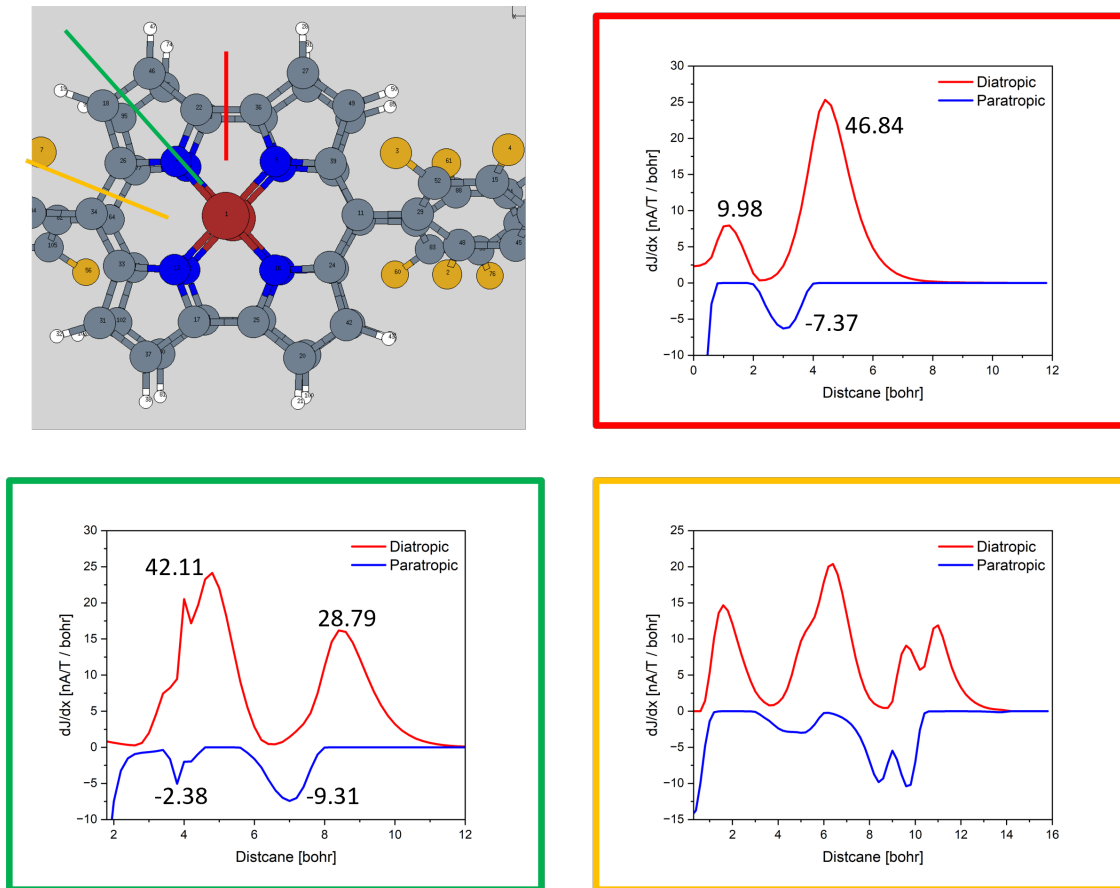

Fig. S6 The positions of the integration planes of  $1_2$  for determining the strength of the current-density pathways are shown with the colored lines in the upper-left picture. The current density is calculated at the CAM-B3LYP/def2-TZVP level. The three other pictures show the calculated ring-current profiles. The color of the frame around them matches the color of the integration plane in the upper left picture. The pictures have been made with Origin<sup>2</sup> and PowerPoint.

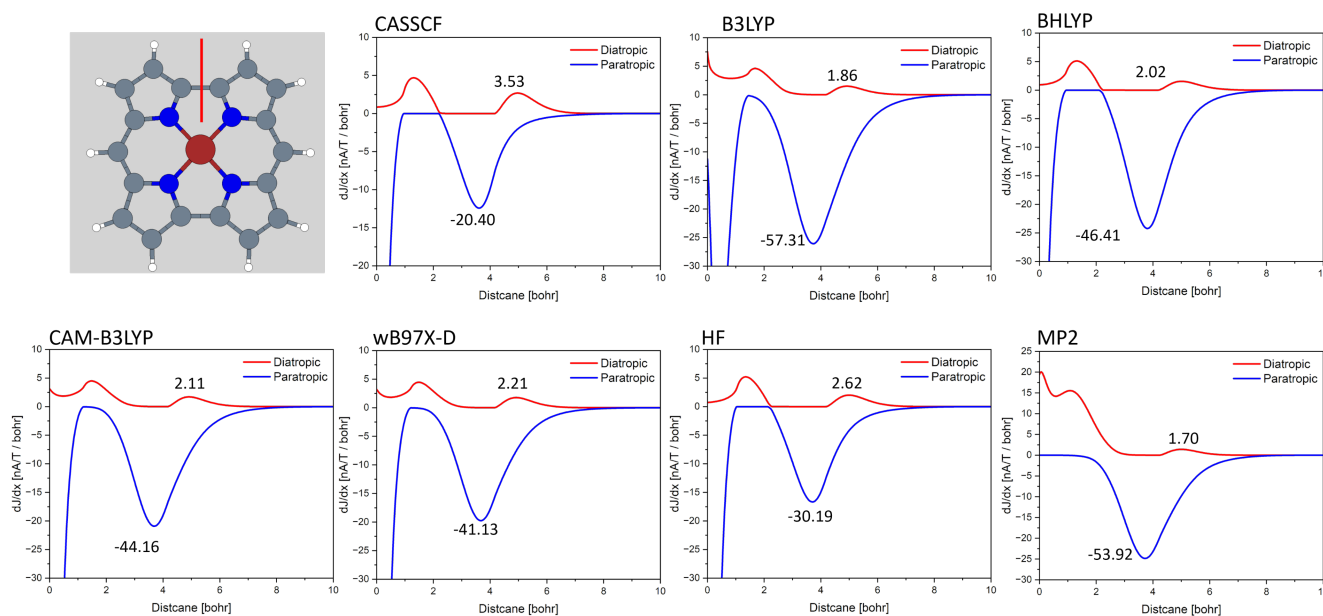

Fig. S7 The ring-current profile of  $1'$  passing through the red plane. The current density is calculated at different levels of theory. The pentafluorophenyl substituents are replaced with hydrogen atoms.

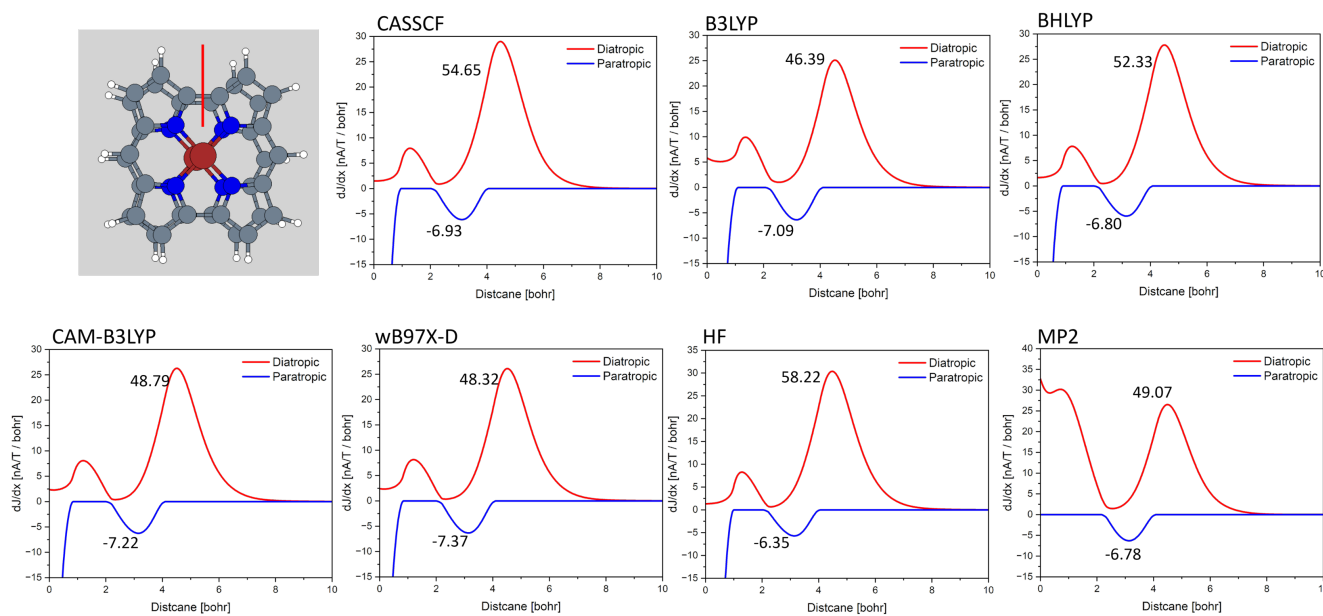

Fig. S8 The ring-current profile of  $1_2$  passing through the red plane. The current density is calculated at different levels of theory. The pentafluorophenyl substituents are replaced with hydrogen atoms.

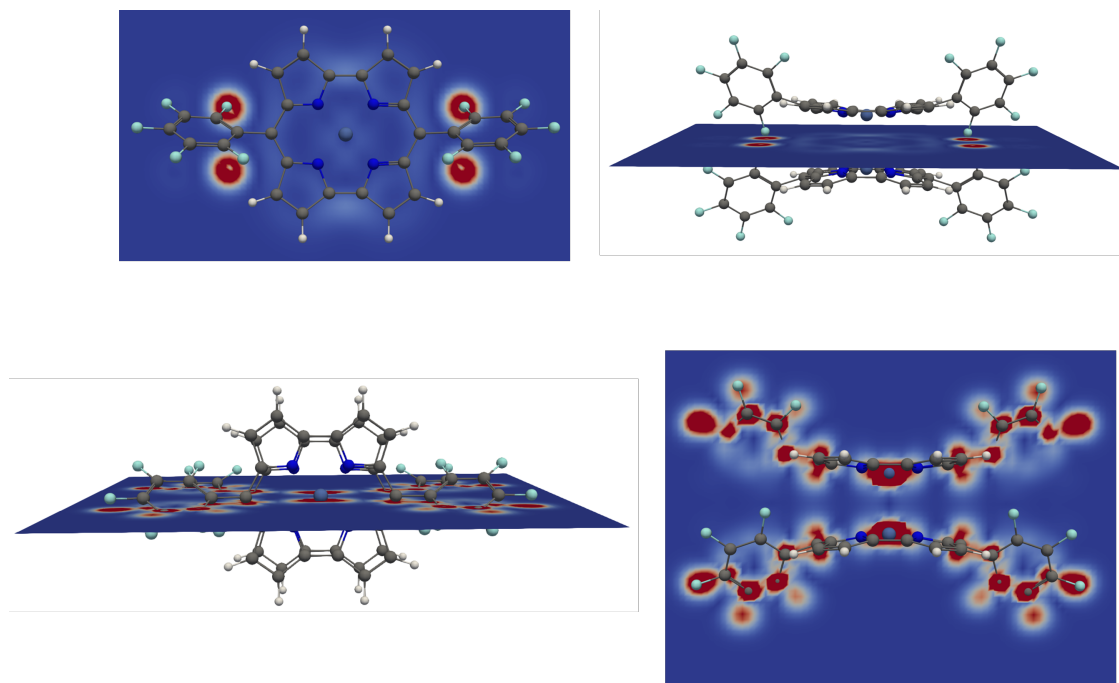

Fig. S9 The upper left picture is the top view of the current density crossing the plane which is perpendicular to the external magnetic field as shown in the upper right picture. The four strong red spots are due to the adjacent H atoms. The lower right picture shows the current density passing through a plane in the middle of  $1_2$ . The magnetic field is from above parallel to the plane. The same plane is shown as a side view in the lower left picture. The pictures were made with Paraview.

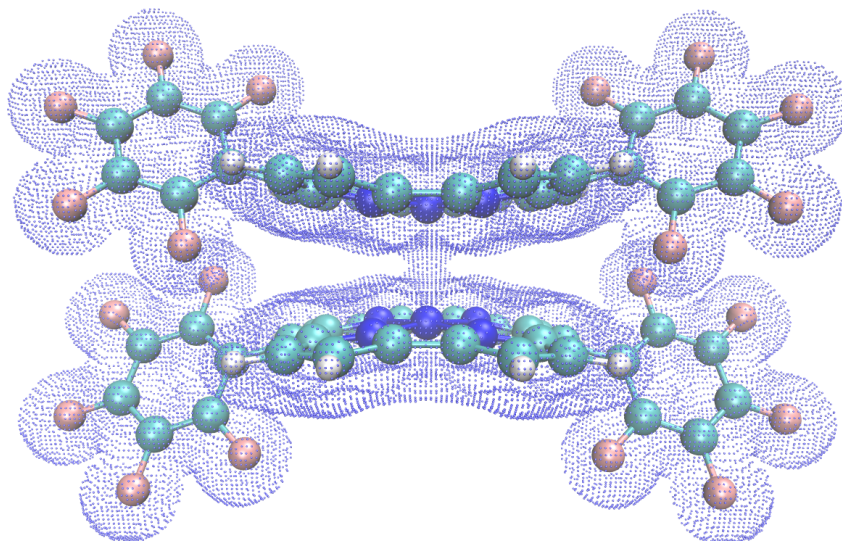

Fig. S10 The electron density of **1<sub>2</sub>**. The electron density between the two Ni atoms is seen.

## S5 Isotropic nuclear magnetic shielding constants

### S5.1 Monomer

Monomer 1H NMR shielding constants in beta position

| Level          | Average   | H19       | H21       | H28       | H32       |
|----------------|-----------|-----------|-----------|-----------|-----------|
| B3LYP/TZVP     | 30.974303 | 30.858047 | 31.069241 | 31.097967 | 30.865421 |
| BHLYP/TZVP     | 29.844912 | 29.654736 | 30.008080 | 30.029742 | 29.679327 |
| CAM-B3LYP/TZVP | 29.351458 | 29.178386 | 29.500103 | 29.516093 | 29.203741 |
| wB97X-D/TZVP   | 29.002611 | 28.819628 | 29.161281 | 29.175052 | 28.846870 |
| HF/TZVP        | 28.274654 | 27.921137 | 28.594187 | 28.602199 | 27.972123 |
| HF/SVP         | 28.337066 | 28.066465 | 28.579962 | 28.580048 | 28.112918 |
| MP2/SVP        | 31.112409 | 31.246931 | 30.978735 | 31.000035 | 31.220486 |

Monomer 1H NMR shielding constants in beta position

| Level          | H38       | H43       | H47       | H50       |
|----------------|-----------|-----------|-----------|-----------|
| B3LYP/TZVP     | 31.068962 | 30.869518 | 31.098146 | 30.867118 |
| BHLYP/TZVP     | 30.007399 | 29.682879 | 30.029657 | 29.667479 |
| CAM-B3LYP/TZVP | 29.499614 | 29.207357 | 29.515570 | 29.190796 |
| wB97X-D/TZVP   | 29.160813 | 28.850511 | 29.174461 | 28.832271 |
| HF/TZVP        | 28.593320 | 27.973590 | 28.601496 | 27.939176 |
| HF/SVP         | 28.579359 | 28.115478 | 28.578843 | 28.083458 |
| MP2/SVP        | 30.978676 | 31.225625 | 30.999358 | 31.249424 |

Monomer 61Ni NMR shielding constants

| Ni             |               |
|----------------|---------------|
| B3LYP/TZVP     | -4352.584550  |
| BHLYP/TZVP     | -7242.372009  |
| CAM-B3LYP/TZVP | -4650.449617  |
| wB97X-D/TZVP   | -4772.027240  |
| HF/TZVP        | -14608.279269 |
| HF/SVP         | -14054.967261 |
| MP2/SVP        | 2797.108328   |

Monomer 13C NMR shielding constants in beta position next to the direct link between the pyrrole rings

| Level          | Average   | C20       | C27       | C37       | C46       |
|----------------|-----------|-----------|-----------|-----------|-----------|
| B3LYP/TZVP     | 66.031905 | 65.938668 | 66.118262 | 65.945586 | 66.125102 |
| BHLYP/TZVP     | 69.273729 | 69.206393 | 69.334067 | 69.212684 | 69.341773 |
| CAM-B3LYP/TZVP | 67.224395 | 67.170318 | 67.270423 | 67.181597 | 67.275243 |
| wB97X-D/TZVP   | 69.645828 | 69.598012 | 69.685051 | 69.609716 | 69.690533 |
| HF/TZVP        | 78.004785 | 77.991878 | 78.011017 | 78.003501 | 78.012744 |
| HF/SVP         | 88.747752 | 88.735640 | 88.747041 | 88.750418 | 88.757909 |
| MP2/SVP        | 93.762020 | 93.616816 | 93.898151 | 93.607028 | 93.926083 |

Monomer 13C NMR shielding constants in beta position next to the meso link between the pyrrole rings

| Level          | Average   | C18       | C31       | C42       | C49       |
|----------------|-----------|-----------|-----------|-----------|-----------|
| B3LYP/TZVP     | 48.175593 | 48.261886 | 48.057676 | 48.064162 | 48.318649 |
| BHLYP/TZVP     | 46.218602 | 46.250518 | 46.157665 | 46.141392 | 46.324831 |
| CAM-B3LYP/TZVP | 46.042281 | 46.074708 | 45.979860 | 45.966890 | 46.147667 |
| wB97X-D/TZVP   | 49.006877 | 49.031052 | 48.951925 | 48.940861 | 49.103669 |
| HF/TZVP        | 45.897014 | 45.813432 | 45.951305 | 45.881036 | 45.942284 |
| HF/SVP         | 59.073237 | 59.013079 | 59.120616 | 59.042750 | 59.116501 |
| MP2/SVP        | 86.781389 | 86.966208 | 86.599733 | 86.617879 | 86.941735 |



Monomer 15N NMR shielding constants of the nitrogen atoms

| Level          | Average(9,10) | N9         | N10        |
|----------------|---------------|------------|------------|
| B3LYP/TZVP     | -16.680038    | -16.698169 | -16.661907 |
| BHLYP/TZVP     | 1.669926      | 1.648914   | 1.690937   |
| CAM-B3LYP/TZVP | -7.448288     | -7.467070  | -7.429505  |
| wB97X-D/TZVP   | -3.208477     | -3.225564  | -3.191389  |
| HF/TZVP        | 31.596737     | 31.559056  | 31.634418  |
| HF/SVP         | 55.167424     | 55.119375  | 55.215472  |
| MP2/SVP        | 36.475950     | 36.521520  | 36.430380  |

Monomer 15N NMR shielding constants of the nitrogen atoms

| Level          | Average(12,16) | N12        | N16        | Average(9,10,12,16) |
|----------------|----------------|------------|------------|---------------------|
| B3LYP/TZVP     | -14.702983     | -14.697041 | -14.708924 | -15.691511          |
| BHLYP/TZVP     | 3.378677       | 3.387175   | 3.370178   | 2.524302            |
| CAM-B3LYP/TZVP | -5.686155      | -5.673852  | -5.698457  | -6.567222           |
| wB97X-D/TZVP   | -1.496954      | -1.481878  | -1.512029  | -2.352716           |
| HF/TZVP        | 32.961314      | 32.958521  | 32.964107  | 32.279026           |
| HF/SVP         | 56.422355      | 56.425893  | 56.418816  | 55.794890           |
| MP2/SVP        | 37.967337      | 37.98748   | 37.947193  | 37.221644           |

## S5.2 Monomer without pentafluorophenyl groups

Monomer 1H NMR shielding constants in beta position

| Level             | Average   | H9        | H11       | H17       | H20       |
|-------------------|-----------|-----------|-----------|-----------|-----------|
| B3LYP/TZVP        | 30.553719 | 30.253060 | 30.850568 | 30.895842 | 30.215404 |
| BHLYP/TZVP        | 29.381975 | 28.993586 | 29.766352 | 29.805246 | 28.962466 |
| CAM-B3LYP/TZVP    | 28.984064 | 28.624983 | 29.340204 | 29.374230 | 28.596552 |
| wB97X-D/TZVP      | 28.665827 | 28.304313 | 29.024886 | 29.056704 | 28.277134 |
| HF/TZVP           | 27.937050 | 27.375640 | 28.494279 | 28.522839 | 27.354902 |
| HF/SVP            | 27.922430 | 27.448429 | 28.392464 | 28.416728 | 27.431463 |
| MP2/SVP           | 30.180891 | 30.093267 | 30.268147 | 30.304807 | 30.057136 |
| CASSCF/TZVP 14/14 | 26.8919   | 26.2772   | 27.5018   | 27.5204   | 26.2675   |

Monomer 1H NMR shielding constants in beta position

| Level             | H25       | H28       | H31       | H33       |
|-------------------|-----------|-----------|-----------|-----------|
| B3LYP/TZVP        | 30.850177 | 30.215437 | 30.900169 | 30.249095 |
| BHLYP/TZVP        | 29.766070 | 28.961978 | 29.809293 | 28.990812 |
| CAM-B3LYP/TZVP    | 29.340178 | 28.596066 | 29.377788 | 28.622511 |
| wB97X-D/TZVP      | 29.024825 | 28.276702 | 29.060145 | 28.301908 |
| HF/TZVP           | 28.494221 | 27.353003 | 28.526428 | 27.375090 |
| HF/SVP            | 28.392238 | 27.430057 | 28.420366 | 27.447695 |
| MP2/SVP           | 30.266422 | 30.059464 | 30.308990 | 30.088898 |
| CASSCF/TZVP 14/14 | 27.5031   | 26.2656   | 27.5219   | 26.2775   |

Monomer 61Ni NMR shielding constants

|                   | Ni            |
|-------------------|---------------|
| B3LYP/TZVP        | -4347.946257  |
| BHLYP/TZVP        | -7218.463850  |
| CAM-B3LYP/TZVP    | -4642.442260  |
| wB97X-D/TZVP      | -4764.158895  |
| HF/TZVP           | -14555.781068 |
| HF/SVP            | -13978.731505 |
| MP2/SVP           | 2742.411109   |
| CASSCF/TZVP 14/14 | -7684.2286    |

Monomer 13C NMR shielding constants in beta position next to the direct link between the pyrrole rings

| Level             | Average   | C10       | C16       | C24       | C30       |
|-------------------|-----------|-----------|-----------|-----------|-----------|
| B3LYP/TZVP        | 67.192170 | 67.013585 | 67.356646 | 67.006755 | 67.391695 |
| BHLYP/TZVP        | 70.565611 | 70.433245 | 70.682372 | 70.431636 | 70.715190 |
| CAM-B3LYP/TZVP    | 68.421043 | 68.300556 | 68.526333 | 68.303448 | 68.553835 |
| wB97X-D/TZVP      | 70.754916 | 70.646808 | 70.848922 | 70.650324 | 70.873611 |
| HF/TZVP           | 79.380764 | 79.312492 | 79.431468 | 79.319967 | 79.459128 |
| HF/SVP            | 90.230143 | 90.177369 | 90.266388 | 90.184347 | 90.292467 |
| MP2/SVP           | 95.213084 | 95.073240 | 95.343237 | 95.060203 | 95.375656 |
| CASSCF/TZVP 14/14 | 81.9022   | 81.8575   | 81.9328   | 81.8763   | 81.9423   |

Monomer 13C NMR shielding constants in beta position next to the meso link between the pyrrole rings

| Level             | Average   | C8        | C19       | C27       | C32       |
|-------------------|-----------|-----------|-----------|-----------|-----------|
| B3LYP/TZVP        | 48.072852 | 48.350046 | 47.804130 | 47.810389 | 48.326844 |
| BHLYP/TZVP        | 46.322840 | 46.534583 | 46.118037 | 46.108104 | 46.530636 |
| CAM-B3LYP/TZVP    | 45.905531 | 46.117849 | 45.701908 | 45.690572 | 46.111796 |
| wB97X-D/TZVP      | 48.846146 | 49.045024 | 48.655062 | 48.644232 | 49.040265 |
| HF/TZVP           | 46.753580 | 46.488034 | 47.804130 | 46.197985 | 46.524171 |
| HF/SVP            | 59.367038 | 59.482446 | 59.257947 | 59.215131 | 59.512629 |
| MP2/SVP           | 85.585348 | 85.821802 | 85.352467 | 85.382846 | 85.784277 |
| CASSCF/TZVP 14/14 | 47.8902   | 47.9757   | 47.8153   | 47.7824   | 47.9872   |

Monomer 15N NMR shielding constants of the nitrogen atoms

| Level             | Average (2,3) | N2         | N3         |
|-------------------|---------------|------------|------------|
| B3LYP/TZVP        | -15.568332    | -15.557844 | -15.578820 |
| BHLYP/TZVP        | 2.910113      | 2.917094   | 2.903132   |
| CAM-B3LYP/TZVP    | -6.662562     | -6.654002  | -6.671122  |
| wB97X-D/TZVP      | -2.657330     | -2.648540  | -2.666120  |
| HF/TZVP           | 31.956750     | 31.949431  | 31.964068  |
| HF/SVP            | 56.356064     | 56.346214  | 56.365914  |
| MP2/SVP           | 40.551510     | 40.587040  | 40.515979  |
| CASSCF/TZVP 14/14 | 36.3585       | 36.4352    | 36.2818    |

Monomer 15N NMR shielding constants of the nitrogen atoms

| Level             | Average(5,6) | N5         | N6         | Average(2,3,5,6) |
|-------------------|--------------|------------|------------|------------------|
| B3LYP/TZVP        | -13.603580   | -13.600595 | -13.606565 | -14.585956       |
| BHLYP/TZVP        | 4.660326     | 4.673662   | 4.646990   | 3.785220         |
| CAM-B3LYP/TZVP    | -4.869064    | -4.855319  | -4.882808  | -5.765812        |
| wB97X-D/TZVP      | -0.924111    | -0.911469  | -0.936753  | -1.790721        |
| HF/TZVP           | 33.402190    | 33.418477  | 33.385902  | 32.679470        |
| HF/SVP            | 57.704313    | 57.717212  | 57.691414  | 57.030189        |
| MP2/SVP           | 42.197508    | 42.223044  | 42.171971  | 41.374509        |
| CASSCF/TZVP 14/14 | 37.9594      | 38.0632    | 37.8555    | 37.1590          |

## S6 Free-base norcorrole

Monomer 1H NMR shielding constants in beta position

| Level          | Average   | H6        | H7        | H25       | H26       |
|----------------|-----------|-----------|-----------|-----------|-----------|
| B3LYP/TZVP     | 28.978886 | 28.995852 | 28.246303 | 29.094575 | 28.995850 |
| BHLYP/TZVP     | 28.981343 | 28.998500 | 28.250225 | 29.096133 | 28.998506 |
| CAM-B3LYP/TZVP | 27.654660 | 27.727797 | 26.914424 | 27.755056 | 27.727797 |
| wB97X-D/TZVP   | 27.439136 | 27.529794 | 26.696939 | 27.529144 | 27.529794 |

|                   |           |           |           |           |           |
|-------------------|-----------|-----------|-----------|-----------|-----------|
| HF/TZVP           | 26.986395 | 27.170892 | 26.032549 | 27.144952 | 27.170892 |
| HF/SVP            | 26.988906 | 27.086590 | 26.134623 | 27.146889 | 27.086590 |
| MP2/SVP           | 28.319314 | 28.158226 | 27.861681 | 28.478966 | 28.158226 |
| CASSCF/TZVP 12/11 | 26.1149   | 26.0240   | 25.3053   | 26.6883   | 26.0300   |
| CASSCF/TZVP 12/12 | 26.6483   | 26.6985   | 26.1987   | 26.9335   | 26.6985   |
| CASSCF/TZVP 16/16 | 26.8267   | 26.7249   | 26.2282   | 27.1992   | 26.7249   |

Monomer 1H NMR shielding constants in beta position

| Level             | H27       | H28       | H29       | H30       |
|-------------------|-----------|-----------|-----------|-----------|
| B3LYP/TZVP        | 29.094574 | 29.578816 | 28.246303 | 29.578816 |
| BHLYP/TZVP        | 29.096138 | 29.580504 | 28.250228 | 29.580510 |
| CAM-B3LYP/TZVP    | 27.755056 | 28.221362 | 26.914424 | 28.221362 |
| wB97X-D/TZVP      | 27.529144 | 28.000666 | 26.696939 | 28.000666 |
| HF/TZVP           | 27.144952 | 27.597185 | 26.032549 | 27.597185 |
| HF/SVP            | 27.146889 | 27.587522 | 26.134623 | 27.587522 |
| MP2/SVP           | 28.478966 | 28.778383 | 27.861681 | 28.778383 |
| CASSCF/TZVP 12/11 | 26.4060   | 26.5787   | 25.3265   | 26.5601   |
| CASSCF/TZVP 12/12 | 26.9335   | 26.7626   | 26.1987   | 26.7626   |
| CASSCF/TZVP 16/16 | 27.1992   | 27.1546   | 26.2282   | 27.1546   |

Monomer 13C NMR shielding constants in beta position next to the direct link between the pyrrole rings

| Level             | Average   | C4        | C20       | C22        | C24        |
|-------------------|-----------|-----------|-----------|------------|------------|
| B3LYP/TZVP        | 67.185208 | 64.343280 | 64.343227 | 70.027170  | 70.027153  |
| BHLYP/TZVP        | 67.234007 | 64.393581 | 64.393677 | 70.074344  | 70.074425  |
| CAM-B3LYP/TZVP    | 67.466256 | 63.596812 | 63.596815 | 71.335696  | 71.335700  |
| wB97X-D/TZVP      | 70.026032 | 66.030322 | 66.030320 | 74.021742  | 74.021743  |
| HF/TZVP           | 76.095458 | 71.363501 | 71.363501 | 80.827414  | 80.827416  |
| HF/SVP            | 87.360310 | 82.526148 | 82.526148 | 92.194472  | 92.194472  |
| MP2/SVP           | 96.573796 | 92.643947 | 92.643947 | 100.503645 | 100.503645 |
| CASSCF/TZVP 12/11 | 71.9308   | 63.8589   | 64.0101   | 79.2906    | 80.5634    |
| CASSCF/TZVP 12/12 | 77.5176   | 77.5187   | 77.5187   | 77.5165    | 77.5165    |
| CASSCF/TZVP 16/16 | 83.0996   | 77.5308   | 77.5308   | 88.6684    | 88.6684    |

Monomer 13C NMR shielding constants in beta position next to the meso link between the pyrrole rings

| Level             | Average   | C5        | C19       | C21       | C23       |
|-------------------|-----------|-----------|-----------|-----------|-----------|
| B3LYP/TZVP        | 50.465969 | 44.593662 | 56.338269 | 56.338266 | 44.593677 |
| BHLYP/TZVP        | 50.476513 | 44.600853 | 56.352165 | 56.352185 | 44.600848 |
| CAM-B3LYP/TZVP    | 48.905438 | 40.981810 | 56.829064 | 56.829066 | 40.981810 |
| wB97X-D/TZVP      | 51.727890 | 43.708200 | 59.747579 | 59.747581 | 43.708199 |
| HF/TZVP           | 53.761489 | 41.520280 | 66.002698 | 66.002699 | 41.520280 |
| HF/SVP            | 66.156681 | 55.294544 | 77.018817 | 77.018817 | 55.294544 |
| MP2/SVP           | 86.863554 | 82.687380 | 91.039727 | 91.039727 | 82.687380 |
| CASSCF/TZVP 12/11 | 59.4681   | 42.5946   | 79.7859   | 72.4654   | 43.0265   |
| CASSCF/TZVP 12/12 | 69.6298   | 61.7331   | 77.5264   | 77.5264   | 61.7331   |
| CASSCF/TZVP 16/16 | 73.6851   | 62.0098   | 85.3604   | 85.3604   | 62.0098   |

Monomer 15N NMR shielding constants of the nitrogen atoms with H

| Level          | Average   | N8        | N11       |
|----------------|-----------|-----------|-----------|
| B3LYP/TZVP     | 17.504962 | 17.504975 | 17.504949 |
| BHLYP/TZVP     | 7.4584270 | 17.458406 | 17.458448 |
| CAM-B3LYP/TZVP | 24.942908 | 24.942907 | 24.942908 |
| wB97X-D/TZVP   | 28.769675 | 28.769675 | 28.769674 |
| HF/TZVP        | 42.239055 | 42.239055 | 42.239054 |
| HF/SVP         | 62.389080 | 62.389080 | 62.389080 |

|                   |           |           |           |
|-------------------|-----------|-----------|-----------|
| MP2/SVP           | 70.047162 | 70.047162 | 70.047162 |
| CASSCF/TZVP 12/11 | 60.4821   | 66.7636   | 54.2006   |
| CASSCF/TZVP 12/12 | 63.3141   | 63.3141   | 63.3140   |
| CASSCF/TZVP 16/16 | 74.7043   | 74.7043   | 74.7043   |

Monomer 15N NMR shielding constants of the nitrogen atoms without H

| Level             | Average    | N1         | N10        |
|-------------------|------------|------------|------------|
| B3LYP/TZVP        | -79.369598 | -79.369600 | -79.369596 |
| BHLYP/TZVP        | -79.344160 | -79.344194 | -79.344126 |
| CAM-B3LYP/TZVP    | -74.049059 | -74.049061 | -74.049057 |
| wB97X-D/TZVP      | -69.765399 | -69.765400 | -69.765397 |
| HF/TZVP           | -66.010815 | -66.010817 | -66.010813 |
| HF/SVP            | -44.353409 | -44.353409 | -44.353409 |
| MP2/SVP           | -12.224169 | -12.224169 | -12.224169 |
| CASSCF/TZVP 12/11 | -40.0573   | -40.6059   | -39.5087   |
| CASSCF/TZVP 12/12 | -55.2609   | -55.2609   | -55.2609   |
| CASSCF/TZVP 16/16 | -53.6272   | -53.6272   | -53.6272   |

### S6.1 Dimer

Dimer 1H NMR shielding constants in beta position

| Level          | Average   | H19       | H21       | H28       | H32       |
|----------------|-----------|-----------|-----------|-----------|-----------|
| B3LYP/TZVP     | 24.203882 | 24.365794 | 23.948604 | 24.074892 | 24.426238 |
| BHLYP/TZVP     | 23.936320 | 24.148082 | 23.614887 | 23.807206 | 24.175105 |
| CAM-B3LYP/TZVP | 23.934371 | 24.132801 | 23.636570 | 23.791528 | 24.176585 |
| wB97X-D/TZVP   | 23.965894 | 24.159637 | 23.674249 | 23.825719 | 24.203971 |
| HF/TZVP        | 24.012204 | 24.284516 | 23.616915 | 23.889364 | 24.258022 |
| HF/SVP         | 24.216070 | 24.472197 | 23.841185 | 24.128844 | 24.422053 |

Dimer 61Ni NMR shielding constants

| Ni             |               |
|----------------|---------------|
| B3LYP/TZVP     | -4188.607224  |
| BHLYP/TZVP     | -6784.455429  |
| CAM-B3LYP/TZVP | -4454.990422  |
| wB97X-D/TZVP   | -4596.989650  |
| HF/TZVP        | -13497.920895 |
| HF/SVP         | -12921.709049 |

Dimer 13C NMR shielding constants in beta position next to the direct link between the pyrrole rings

| Level          | C20       | C27       | Average   |
|----------------|-----------|-----------|-----------|
| B3LYP/TZVP     | 53.985845 | 55.639488 | 54.812667 |
| BHLYP/TZVP     | 55.541490 | 57.622553 | 56.582022 |
| CAM-B3LYP/TZVP | 53.584623 | 55.559253 | 54.571938 |
| wB97X-D/TZVP   | 56.158824 | 58.226628 | 57.192726 |
| HF/TZVP        | 60.580728 | 63.282022 | 61.931375 |
| HF/SVP         | 72.305775 | 75.022248 | 73.664008 |

Dimer 13C NMR shielding constants in beta position next to the meso link between the pyrrole rings

| Level      | C18       | C31       | Average   |
|------------|-----------|-----------|-----------|
| B3LYP/TZVP | 51.082684 | 48.413415 | 49.748050 |

|                |           |           |           |
|----------------|-----------|-----------|-----------|
| BHLYP/TZVP     | 51.932374 | 48.931247 | 50.431811 |
| CAM-B3LYP/TZVP | 50.885271 | 47.869700 | 49.377486 |
| wB97X-D/TZVP   | 53.656153 | 50.647205 | 52.151679 |
| HF/TZVP        | 56.422596 | 53.118551 | 54.770574 |
| HF/SVP         | 67.661519 | 64.900002 | 66.280761 |

Dimer 15N NMR shielding constants of the nitrogen atoms

| Level          | N9         | N12        | Average    |
|----------------|------------|------------|------------|
| B3LYP/TZVP     | 35.526985  | 32.984273  | 34.255629  |
| BHLYP/TZVP     | 54.498968  | 50.461952  | 52.480460  |
| CAM-B3LYP/TZVP | 41.954971  | 38.680915  | 40.317943  |
| wB97X-D/TZVP   | 44.410606  | 41.243016  | 42.826811  |
| HF/TZVP        | 87.527639  | 81.613117  | 84.570378  |
| HF/SVP         | 107.986332 | 103.033408 | 105.509870 |

## S6.2 Dimer without pentafluorophenyl groups

Dimer 1H NMR shielding constants in beta position

| Level            | Average   | H9        | H11       | H17       | H20       |
|------------------|-----------|-----------|-----------|-----------|-----------|
| B3LYP/TZVP       | 24.159793 | 24.452452 | 23.871029 | 24.166852 | 24.148837 |
| BHLYP/TZVP       | 23.906264 | 24.365794 | 23.948604 | 24.074892 | 24.426238 |
| CAM-B3LYP/TZVP   | 23.900729 | 24.224332 | 23.577952 | 23.908039 | 23.892594 |
| wB97X-D/TZVP     | 23.929963 | 24.243381 | 23.615465 | 23.938591 | 23.922413 |
| HF/TZVP          | 24.159793 | 24.452452 | 23.871029 | 24.166852 | 24.148837 |
| HF/SVP           | 24.256600 | 24.646889 | 23.852299 | 24.291817 | 24.235394 |
| MP2/SVP          | 24.121815 | 24.375241 | 23.863486 | 24.075519 | 24.173013 |
| CASSCF/SVP 14/14 | 24.1601   | 24.5299   | 23.7741   | 24.1503   | 24.1860   |

Dimer 61Ni NMR shielding constants

|                  | Ni            |
|------------------|---------------|
| B3LYP/TZVP       | -4164.004090  |
| BHLYP/TZVP       | -6778.177746  |
| CAM-B3LYP/TZVP   | -4444.092310  |
| wB97X-D/TZVP     | -4584.654044  |
| HF/TZVP          | -13495.813469 |
| HF/SVP           | -12918.680881 |
| MP2/SVP          | 2885.550824   |
| CASSCF/SVP 14/14 | -11463.5570   |

Dimer 13C NMR shielding constants in beta position next to the direct link between the pyrrole rings

| Level            | C10       | C16       | Average   |
|------------------|-----------|-----------|-----------|
| B3LYP/TZVP       | 55.377785 | 56.822350 | 56.100068 |
| BHLYP/TZVP       | 57.121683 | 59.028509 | 58.075096 |
| CAM-B3LYP/TZVP   | 55.051095 | 56.826535 | 55.938815 |
| wB97X-D/TZVP     | 57.518063 | 59.355701 | 58.436882 |
| HF/TZVP          | 55.377785 | 56.822350 | 56.100068 |
| HF/SVP           | 73.933327 | 76.260719 | 75.097023 |
| MP2/SVP          | 88.142859 | 89.688051 | 88.915455 |
| CASSCF/SVP 14/14 | 73.5690   | 75.2097   | 74.3894   |

Dimer 13C NMR shielding constants in beta position next to the meso link between the pyrrole rings

| Level            | C8        | C19       | Average   |
|------------------|-----------|-----------|-----------|
| B3LYP/TZVP       | 53.938477 | 49.741892 | 51.840185 |
| BHLYP/TZVP       | 54.927689 | 50.381870 | 52.654780 |
| CAM-B3LYP/TZVP   | 53.601067 | 49.090175 | 51.345621 |
| wB97X-D/TZVP     | 56.186480 | 51.740098 | 53.963289 |
| HF/TZVP          | 53.938477 | 49.741892 | 51.840185 |
| HF/SVP           | 71.054319 | 66.173414 | 68.613867 |
| MP2/SVP          | 86.408773 | 83.110249 | 84.759511 |
| CASSCF/SVP 14/14 | 70.0004   | 66.1298   | 68.0651   |

Dimer <sup>15</sup>N NMR shielding constants of the nitrogen atoms

| Level            | N2         | N5         | Average    |
|------------------|------------|------------|------------|
| B3LYP/TZVP       | 35.913449  | 32.715293  | 34.314371  |
| BHLYP/TZVP       | 54.796619  | 50.127451  | 52.462035  |
| CAM-B3LYP/TZVP   | 42.143007  | 38.329224  | 40.236116  |
| wB97X-D/TZVP     | 44.548389  | 40.872840  | 42.710615  |
| HF/TZVP          | 35.913449  | 32.715293  | 34.314371  |
| HF/SVP           | 107.717453 | 102.266843 | 104.992148 |
| MP2/SVP          | 80.423156  | 77.942535  | 79.182846  |
| CASSCF/SVP 14/14 | 102.9626   | 97.4731    | 100.2179   |

## S7 Cartesian coordinates of the molecular structures

### Monomer or 1

|    |            |            |            |
|----|------------|------------|------------|
| Ni | 1.7345550  | 0.2053831  | -0.1680936 |
| F  | 6.4598840  | -1.3871514 | -2.2698142 |
| F  | 6.3834863  | -0.2270764 | 2.2826189  |
| F  | 9.0036686  | -0.7911953 | 2.4662908  |
| F  | 10.3591021 | -1.6568608 | 0.2893632  |
| F  | 9.0796649  | -1.9538618 | -2.0777384 |
| F  | -2.1157530 | 1.8290029  | 3.0562672  |
| F  | -3.5156126 | 0.8275681  | -1.3165970 |
| N  | 3.2040829  | 1.2264695  | -0.3333216 |
| N  | 0.8532261  | 1.7699155  | -0.1117331 |
| C  | 4.8896229  | -0.4786071 | -0.1112682 |
| N  | 0.2869345  | -0.7955393 | 0.1968809  |
| F  | -6.0416672 | 1.4473436  | -0.6454036 |
| F  | -6.6130195 | 2.2636504  | 1.8716691  |
| C  | 8.3761126  | -0.9331622 | 1.3090200  |
| N  | 2.6406507  | -1.3398888 | -0.0234606 |
| C  | 0.4944385  | -2.0752463 | 0.4792742  |
| C  | -0.5539479 | 3.4483738  | 0.2870792  |
| H  | -1.4500526 | 4.0100334  | 0.5003924  |
| C  | 2.8775927  | -3.4558782 | 0.6094077  |
| H  | 2.6467877  | -4.4611957 | 0.9217248  |
| C  | 1.5809029  | 2.8778987  | -0.1525130 |
| F  | -4.6424081 | 2.4530193  | 3.7176639  |
| C  | 3.9850898  | -1.5566177 | 0.0286479  |
| C  | 1.9499951  | -2.4118356 | 0.3427457  |
| C  | -0.4517568 | 2.0252281  | 0.1874030  |
| C  | 4.3260363  | 3.1414321  | -0.2568455 |
| H  | 4.5475365  | 4.1956411  | -0.2251655 |
| C  | 6.3441606  | -0.7876213 | -0.0003819 |
| C  | -3.0603724 | 1.7358119  | 2.1304968  |
| C  | -1.6520890 | -1.5851855 | 0.9550288  |
| H  | -2.6822731 | -1.6534382 | 1.2681981  |
| C  | -0.9849589 | -0.4071337 | 0.4943322  |
| C  | -1.3390443 | 0.9619864  | 0.4719807  |
| C  | -3.7701720 | 1.2198317  | -0.0760352 |
| C  | 3.0368988  | 2.5414260  | -0.2890742 |
| C  | -0.7317037 | -2.6208181 | 0.9485017  |
| H  | -0.9105196 | -3.6379471 | 1.2566474  |
| C  | 4.5197498  | 0.8756549  | -0.2786706 |
| C  | -4.3601207 | 2.0569066  | 2.4861187  |
| C  | -5.0764567 | 1.5388748  | 0.2561809  |
| C  | 4.1421224  | -2.9257182 | 0.4110948  |
| H  | 5.0769812  | -3.4487917 | 0.5392251  |
| C  | -2.7385193 | 1.3123493  | 0.8482739  |
| C  | 8.4145141  | -1.5307950 | -1.0140256 |
| C  | 0.7094240  | 3.9775342  | 0.0803939  |
| H  | 0.9781997  | 5.0208496  | 0.1065811  |
| C  | 7.0635932  | -1.2369127 | -1.0990488 |
| C  | 5.2474052  | 2.1068365  | -0.2545932 |
| H  | 6.3206268  | 2.2128040  | -0.2246618 |
| C  | 9.0708167  | -1.3779764 | 0.1961931  |
| C  | 7.0260411  | -0.6427571 | 1.1998076  |
| C  | -5.3700746 | 1.9582856  | 1.5432705  |

### Dimer or 1<sub>2</sub>

|    |            |           |            |
|----|------------|-----------|------------|
| Ni | 0.3671731  | 1.3275512 | 0.0000000  |
| F  | -1.1816182 | 0.9042232 | 5.3566523  |
| F  | 2.4627793  | 3.6216580 | 4.0989818  |
| F  | 2.7222191  | 4.4178782 | 6.6234801  |
| F  | 1.0344388  | 3.4969754 | 8.5335554  |
| F  | -0.9235566 | 1.7421044 | 7.8657082  |
| F  | 2.4627793  | 3.6216580 | -4.0989818 |
| F  | -1.1816182 | 0.9042232 | -5.3566523 |
| N  | 1.6523192  | 1.0424741 | 1.2047193  |
| N  | 1.6523192  | 1.0424741 | -1.2047193 |
| C  | 0.5184426  | 1.7588325 | 3.2053035  |

|    |            |            |            |
|----|------------|------------|------------|
| N  | -0.8362037 | 1.8593789  | -1.2122320 |
| F  | -0.9235566 | 1.7421044  | -7.8657082 |
| F  | 1.0344388  | 3.4969754  | -8.5335554 |
| C  | 1.7767657  | 3.5449386  | 6.3076398  |
| N  | -0.8362037 | 1.8593789  | 1.2122320  |
| C  | -1.9812439 | 2.3841373  | -0.7163083 |
| C  | 2.9987338  | 0.8632031  | -2.9674699 |
| H  | 3.3555228  | 0.8662682  | -3.9849843 |
| C  | -2.6944378 | 2.9406427  | 1.8395433  |
| H  | -3.6547983 | 3.4297084  | 1.8089378  |
| C  | 2.8595623  | 0.6690112  | -0.7168114 |
| F  | 2.7222191  | 4.4178782  | -6.6234801 |
| C  | -0.6976105 | 2.0662059  | 2.5306242  |
| C  | -1.9812439 | 2.3841373  | 0.7163083  |
| C  | 1.6551134  | 1.2211477  | -2.5347617 |
| C  | 3.7284738  | 0.5324131  | 1.8587791  |
| H  | 4.7647464  | 0.2355982  | 1.8419980  |
| C  | 0.6547029  | 2.1926036  | 4.6196443  |
| C  | 1.6373533  | 3.1057339  | -5.0013491 |
| C  | -1.9151763 | 2.7522002  | -2.9457138 |
| H  | -2.1566814 | 3.0617027  | -3.9498767 |
| C  | -0.6976105 | 2.0662059  | -2.5306242 |
| C  | 0.5184426  | 1.7588325  | -3.2053035 |
| C  | -0.2064107 | 1.7681669  | -5.6270918 |
| C  | 2.8595623  | 0.6690112  | 0.7168114  |
| C  | -2.6944378 | 2.9406427  | -1.8395433 |
| H  | -3.6547983 | 3.4297084  | -1.8089378 |
| C  | 1.6551134  | 1.2211477  | 2.5347617  |
| C  | 1.7767657  | 3.5449386  | -6.3076398 |
| C  | -0.0892127 | 2.1927388  | -6.9388689 |
| C  | -1.9151763 | 2.7522002  | 2.9457138  |
| H  | -2.1566814 | 3.0617027  | 3.9498767  |
| C  | 0.6547029  | 2.1926036  | -4.6196443 |
| C  | -0.0892127 | 2.1927388  | 6.9388689  |
| C  | 3.7284738  | 0.5324131  | -1.8587791 |
| H  | 4.7647464  | 0.2355982  | -1.8419980 |
| C  | -0.2064107 | 1.7681669  | 5.6270918  |
| C  | 2.9987338  | 0.8632031  | 2.9674699  |
| H  | 3.3555228  | 0.8662682  | 3.9849843  |
| C  | 0.9114634  | 3.0840072  | 7.2840258  |
| C  | 1.6373533  | 3.1057339  | 5.0013491  |
| C  | 0.9114634  | 3.0840072  | -7.2840258 |
| Ni | -0.3671731 | -1.3275512 | 0.0000000  |
| F  | 1.1816182  | -0.9042232 | -5.3566523 |
| F  | -2.4627793 | -3.6216580 | -4.0989818 |
| F  | -2.7222191 | -4.4178782 | -6.6234801 |
| F  | -1.0344388 | -3.4969754 | -8.5335554 |
| F  | 0.9235566  | -1.7421044 | -7.8657082 |
| F  | -2.4627793 | -3.6216580 | 4.0989818  |
| F  | 1.1816182  | -0.9042232 | 5.3566523  |
| N  | -1.6523192 | -1.0424741 | -1.2047193 |
| N  | -1.6523192 | -1.0424741 | 1.2047193  |
| C  | -0.5184426 | -1.7588325 | -3.2053035 |
| N  | 0.8362037  | -1.8593789 | 1.2122320  |
| F  | 0.9235566  | -1.7421044 | 7.8657082  |
| F  | -1.0344388 | -3.4969754 | 8.5335554  |
| C  | -1.7767657 | -3.5449386 | -6.3076398 |
| N  | 0.8362037  | -1.8593789 | -1.2122320 |
| C  | 1.9812439  | -2.3841373 | 0.7163083  |
| C  | -2.9987338 | -0.8632031 | 2.9674699  |
| H  | -3.3555228 | -0.8662682 | 3.9849843  |
| C  | 2.6944378  | -2.9406427 | -1.8395433 |
| H  | 3.6547983  | -3.4297084 | -1.8089378 |
| C  | -2.8595623 | -0.6690112 | 0.7168114  |
| F  | -2.7222191 | -4.4178782 | 6.6234801  |
| C  | 0.6976105  | -2.0662059 | -2.5306242 |
| C  | 1.9812439  | -2.3841373 | -0.7163083 |
| C  | -1.6551134 | -1.2211477 | 2.5347617  |
| C  | -3.7284738 | -0.5324131 | -1.8587791 |



|   |            |            |            |
|---|------------|------------|------------|
| H | -4.7647464 | -0.2355982 | -1.8419980 |
| C | -0.6547029 | -2.1926036 | -4.6196443 |
| C | -1.6373533 | -3.1057339 | 5.0013491  |
| C | 1.9151763  | -2.7522002 | 2.9457138  |
| H | 2.1566814  | -3.0617027 | 3.9498767  |
| C | 0.6976105  | -2.0662059 | 2.5306242  |
| C | -0.5184426 | -1.7588325 | 3.2053035  |
| C | 0.2064107  | -1.7681669 | 5.6270918  |
| C | -2.8595623 | -0.6690112 | -0.7168114 |
| C | 2.6944378  | -2.9406427 | 1.8395433  |
| H | 3.6547983  | -3.4297084 | 1.8089378  |
| C | -1.6551134 | -1.2211477 | -2.5347617 |
| C | -1.7767657 | -3.5449386 | 6.3076398  |
| C | 0.0892127  | -2.1927388 | 6.9388689  |
| C | 1.9151763  | -2.7522002 | -2.9457138 |
| H | 2.1566814  | -3.0617027 | -3.9498767 |
| C | -0.6547029 | -2.1926036 | 4.6196443  |
| C | 0.0892127  | -2.1927388 | -6.9388689 |
| C | -3.7284738 | -0.5324131 | 1.8587791  |
| H | -4.7647464 | -0.2355982 | 1.8419980  |
| C | 0.2064107  | -1.7681669 | -5.6270918 |
| C | -2.9987338 | -0.8632031 | -2.9674699 |
| H | -3.3555228 | -0.8662682 | -3.9849843 |
| C | -0.9114634 | -3.0840072 | -7.2840258 |
| C | -1.6373533 | -3.1057339 | -5.0013491 |
| C | -0.9114634 | -3.0840072 | 7.2840258  |

Phenyl-substituted dimer with  $C_2$  symmetry or  $2_2$

|    |            |            |            |
|----|------------|------------|------------|
| Ni | -1.1544643 | -0.8711229 | 0.0120983  |
| H  | 0.1457191  | -1.5440709 | 5.2249419  |
| H  | -3.8620005 | -0.2115500 | 4.5410863  |
| H  | -4.3105787 | -0.3202600 | 6.9573109  |
| H  | -2.5447573 | -1.0904190 | 8.5177239  |
| H  | -0.3118299 | -1.7066288 | 7.6293046  |
| H  | -3.3889821 | -0.9523312 | -4.8456332 |
| H  | 0.7854324  | -1.8588925 | -4.9011152 |
| N  | -2.0580748 | 0.2226513  | 1.1160989  |
| N  | -1.9249232 | 0.0749982  | -1.3005578 |
| C  | -1.5613038 | -0.8331546 | 3.2510013  |
| N  | -0.4318307 | -2.0852857 | -1.1056461 |
| H  | 0.7221470  | -2.0356188 | -7.3540894 |
| H  | -1.4020704 | -1.6529137 | -8.5728492 |
| C  | -3.3333048 | -0.5934915 | 6.5797017  |
| N  | -0.5569384 | -1.9332892 | 1.3345267  |
| C  | 0.0637760  | -3.2027685 | -0.5142559 |
| C  | -2.5847683 | 1.0651820  | -3.1882718 |
| H  | -2.7452805 | 1.2810848  | -4.2299319 |
| C  | 0.0740989  | -3.9303854 | 2.1193217  |
| H  | 0.4637254  | -4.9342845 | 2.1604436  |
| C  | -2.5958965 | 1.1737241  | -0.9241443 |
| H  | -3.4616669 | -1.1174139 | -7.3014472 |
| C  | -0.8513993 | -1.9028558 | 2.6703125  |
| C  | -0.0394944 | -3.1063443 | 0.9413256  |
| C  | -1.8715468 | -0.0867040 | -2.6547428 |
| C  | -3.1278074 | 2.1156717  | 1.5869277  |
| H  | -3.6452992 | 3.0559348  | 1.4889699  |
| C  | -1.8262151 | -0.8793209 | 4.6994009  |
| C  | -2.4844735 | -1.1656091 | -5.3977937 |
| C  | -0.0670552 | -3.5320281 | -2.7530340 |
| H  | -0.0174576 | -3.9787572 | -3.7318476 |
| C  | -0.5628137 | -2.2205079 | -2.4426864 |
| C  | -1.2315139 | -1.1994056 | -3.2335260 |
| C  | -0.1439994 | -1.7090055 | -5.4265225 |
| C  | -2.6623870 | 1.2878929  | 0.5330763  |
| C  | 0.3210378  | -4.1356520 | -1.5565512 |
| H  | 0.7188670  | -5.1312710 | -1.4447263 |
| C  | -2.1067259 | 0.2651424  | 2.4654540  |
| C  | -2.5247596 | -1.2704807 | -6.7808812 |
| C  | -0.1832012 | -1.8047825 | -6.8082639 |

|    |            |            |            |
|----|------------|------------|------------|
| C  | -0.4267636 | -3.2034166 | 3.1728869  |
| H  | -0.5150450 | -3.5475969 | 4.1890401  |
| C  | -1.2886768 | -1.3673247 | -4.6967893 |
| C  | -1.0976997 | -1.3883954 | 6.9570048  |
| C  | -3.0284716 | 1.8277124  | -2.1302144 |
| H  | -3.5789975 | 2.7510599  | -2.1943955 |
| C  | -0.8403395 | -1.3104985 | 5.5972242  |
| C  | -2.7842981 | 1.4856163  | 2.7879027  |
| H  | -2.9808305 | 1.8653743  | 3.7757094  |
| C  | -2.3441086 | -1.0299168 | 7.4558787  |
| C  | -3.0787698 | -0.5194505 | 5.2184266  |
| C  | -1.3722535 | -1.5811183 | -7.4931830 |
| Ni | 1.1544643  | 0.8711229  | 0.0120983  |
| H  | -0.7854324 | 1.8588925  | -4.9011152 |
| H  | 3.3889821  | 0.9523312  | -4.8456332 |
| H  | 3.4616669  | 1.1174139  | -7.3014472 |
| H  | 1.4020704  | 1.6529137  | -8.5728492 |
| H  | -0.7221470 | 2.0356188  | -7.3540894 |
| H  | 3.8620005  | 0.2115500  | 4.5410863  |
| H  | -0.1457191 | 1.5440709  | 5.2249419  |
| N  | 1.9249232  | -0.0749982 | -1.3005578 |
| N  | 2.0580748  | -0.2226513 | 1.1160989  |
| C  | 1.2315139  | 1.1994056  | -3.2335260 |
| N  | 0.5569384  | 1.9332892  | 1.3345267  |
| H  | 0.3118299  | 1.7066288  | 7.6293046  |
| H  | 2.5447573  | 1.0904190  | 8.5177239  |
| C  | 2.5247596  | 1.2704807  | -6.7808812 |
| N  | 0.4318307  | 2.0852857  | -1.1056461 |
| C  | 0.0394944  | 3.1063443  | 0.9413256  |
| C  | 2.7842981  | -1.4856163 | 2.7879027  |
| H  | 2.9808305  | -1.8653743 | 3.7757094  |
| C  | -0.3210378 | 4.1356520  | -1.5565512 |
| H  | -0.7188670 | 5.1312710  | -1.4447263 |
| C  | 2.6623870  | -1.2878929 | 0.5330763  |
| H  | 4.3105787  | 0.3202600  | 6.9573109  |
| C  | 0.5628137  | 2.2205079  | -2.4426864 |
| C  | -0.0637760 | 3.2027685  | -0.5142559 |
| C  | 2.1067259  | -0.2651424 | 2.4654540  |
| C  | 3.0284716  | -1.8277124 | -2.1302144 |
| H  | 3.5789975  | -2.7510599 | -2.1943955 |
| C  | 1.2886768  | 1.3673247  | -4.6967893 |
| C  | 3.0787698  | 0.5194505  | 5.2184266  |
| C  | 0.4267636  | 3.2034166  | 3.1728869  |
| H  | 0.5150450  | 3.5475969  | 4.1890401  |
| C  | 0.8513993  | 1.9028558  | 2.6703125  |
| C  | 1.5613038  | 0.8331546  | 3.2510013  |
| C  | 0.8403395  | 1.3104985  | 5.5972242  |
| C  | 2.5958965  | -1.1737241 | -0.9241443 |
| C  | -0.0740989 | 3.9303854  | 2.1193217  |
| H  | -0.4637254 | 4.9342845  | 2.1604436  |
| C  | 1.8715468  | 0.0867040  | -2.6547428 |
| C  | 3.3333048  | 0.5934915  | 6.5797017  |
| C  | 1.0976997  | 1.3883954  | 6.9570048  |
| C  | 0.0670552  | 3.5320281  | -2.7530340 |
| H  | 0.0174576  | 3.9787572  | -3.7318476 |
| C  | 1.8262151  | 0.8793209  | 4.6994009  |
| C  | 0.1832012  | 1.8047825  | -6.8082639 |
| C  | 3.1278074  | -2.1156717 | 1.5869277  |
| H  | 3.6452992  | -3.0559348 | 1.4889699  |
| C  | 0.1439994  | 1.7090055  | -5.4265225 |
| C  | 2.5847683  | -1.0651820 | -3.1882718 |
| H  | 2.7452805  | -1.2810848 | -4.2299319 |
| C  | 1.3722535  | 1.5811183  | -7.4931830 |
| C  | 2.4844735  | 1.1656091  | -5.3977937 |
| C  | 2.3441086  | 1.0299168  | 7.4558787  |

Monomer without pentafluorophenyl groups or 1'

|    |            |            |           |
|----|------------|------------|-----------|
| Ni | -0.0000123 | 0.1036975  | 0.4184611 |
| N  | 1.2122121  | -1.2067988 | 0.6247207 |

|   |            |            |            |
|---|------------|------------|------------|
| N | -1.2107946 | -1.2077371 | 0.6229743  |
| C | 3.2095997  | 0.0209327  | 0.0763054  |
| N | -1.2136114 | 1.3669273  | 0.0158621  |
| N | 1.2122592  | 1.3679287  | 0.0160783  |
| C | -0.7512069 | 2.5222135  | -0.4445187 |
| C | -2.9884140 | -2.5452624 | 0.5363164  |
| H | -4.0031189 | -2.9025952 | 0.4547349  |
| C | 1.8587756  | 3.2841440  | -0.9027320 |
| H | 1.8316842  | 4.2734194  | -1.3294367 |
| C | -0.7491842 | -2.4430251 | 0.7636275  |
| C | 2.5606700  | 1.2573244  | -0.1475031 |
| C | 0.7489857  | 2.5228239  | -0.4441149 |
| C | -2.5614179 | -1.1834855 | 0.4416548  |
| C | 1.8650089  | -3.3267762 | 0.7308534  |
| H | 1.8409206  | -4.4001479 | 0.8242123  |
| H | 4.2759265  | -0.0237584 | -0.1102484 |
| C | -2.9870337 | 2.4962534  | -0.7174450 |
| H | -3.9997956 | 2.7672006  | -0.9722278 |
| C | -2.5617869 | 1.2551151  | -0.1483655 |
| C | -3.2100415 | 0.0181925  | 0.0755881  |
| C | 0.7514115  | -2.4426263 | 0.7640517  |
| C | -1.8613494 | 3.2821525  | -0.9042197 |
| H | -1.8349685 | 4.2711662  | -1.3315798 |
| C | 2.5625090  | -1.1814863 | 0.4428000  |
| C | 2.9850496  | 2.4993653  | -0.7154804 |
| H | 3.9977491  | 2.7716198  | -0.9690587 |
| H | -4.2763717 | -0.0275471 | -0.1105462 |
| C | -1.8622803 | -3.3278548 | 0.7317922  |
| H | -1.8375561 | -4.4011239 | 0.8262165  |
| C | 2.9906192  | -2.5431050 | 0.5354676  |
| H | 4.0055770  | -2.8994776 | 0.4530703  |

Dimer without pentafluorophenyl groups or  $1'_2$

|    |            |            |            |
|----|------------|------------|------------|
| Ni | -1.3631938 | -0.1972603 | 0.0000000  |
| N  | -1.6185891 | 1.0941124  | 1.2047196  |
| N  | -1.6185891 | 1.0941124  | -1.2047196 |
| C  | -1.8189081 | -0.2320544 | 3.2053042  |
| N  | -1.3666084 | -1.5129143 | -1.2122323 |
| N  | -1.3666084 | -1.5129143 | 1.2122323  |
| C  | -1.3869924 | -2.7723084 | -0.7163085 |
| C  | -1.9954924 | 2.3990703  | -2.9674705 |
| H  | -2.1416763 | 2.7245516  | -3.9849851 |
| C  | -1.6099866 | -3.6490169 | 1.8395437  |
| H  | -1.6719010 | -4.7249559 | 1.8089382  |
| C  | -1.7617434 | 2.3496673  | -0.7168116 |
| C  | -1.6116950 | -1.4691183 | 2.5306247  |
| C  | -1.3869924 | -2.7723084 | 0.7163085  |
| C  | -1.7833240 | 1.0248703  | -2.5347622 |
| C  | -1.9858358 | 3.2002254  | 1.8587795  |
| H  | -2.1304718 | 4.2684206  | 1.8419984  |
| H  | -2.0207841 | -0.2483307 | 4.2667731  |
| C  | -1.7505786 | -2.8597177 | -2.9457144 |
| H  | -1.9369414 | -3.2052398 | -3.9498775 |
| C  | -1.6116950 | -1.4691183 | -2.5306247 |
| C  | -1.8189081 | -0.2320544 | -3.2053042 |
| C  | -1.7617434 | 2.3496673  | 0.7168116  |
| C  | -1.6099866 | -3.6490169 | -1.8395437 |
| H  | -1.6719010 | -4.7249559 | -1.8089382 |
| C  | -1.7833240 | 1.0248703  | 2.5347622  |
| C  | -1.7505786 | -2.8597177 | 2.9457144  |
| H  | -1.9369414 | -3.2052398 | 3.9498775  |
| H  | -2.0207841 | -0.2483307 | -4.2667731 |
| C  | -1.9858358 | 3.2002254  | -1.8587795 |
| H  | -2.1304718 | 4.2684206  | -1.8419984 |
| C  | -1.9954924 | 2.3990703  | 2.9674705  |
| H  | -2.1416763 | 2.7245516  | 3.9849851  |
| Ni | 1.3631938  | 0.1972603  | 0.0000000  |
| N  | 1.6185891  | -1.0941124 | -1.2047196 |
| N  | 1.6185891  | -1.0941124 | 1.2047196  |

|   |           |            |            |
|---|-----------|------------|------------|
| C | 1.8189081 | 0.2320544  | -3.2053042 |
| N | 1.3666084 | 1.5129143  | 1.2122323  |
| N | 1.3666084 | 1.5129143  | -1.2122323 |
| C | 1.3869924 | 2.7723084  | 0.7163085  |
| C | 1.9954924 | -2.3990703 | 2.9674705  |
| H | 2.1416763 | -2.7245516 | 3.9849851  |
| C | 1.6099866 | 3.6490169  | -1.8395437 |
| H | 1.6719010 | 4.7249559  | -1.8089382 |
| C | 1.7617434 | -2.3496673 | 0.7168116  |
| C | 1.6116950 | 1.4691183  | -2.5306247 |
| C | 1.3869924 | 2.7723084  | -0.7163085 |
| C | 1.7833240 | -1.0248703 | 2.5347622  |
| C | 1.9858358 | -3.2002254 | -1.8587795 |
| H | 2.1304718 | -4.2684206 | -1.8419984 |
| H | 2.0207841 | 0.2483307  | -4.2667731 |
| C | 1.7505786 | 2.8597177  | 2.9457144  |
| H | 1.9369414 | 3.2052398  | 3.9498775  |
| C | 1.6116950 | 1.4691183  | 2.5306247  |
| C | 1.8189081 | 0.2320544  | 3.2053042  |
| C | 1.7617434 | -2.3496673 | -0.7168116 |
| C | 1.6099866 | 3.6490169  | 1.8395437  |
| H | 1.6719010 | 4.7249559  | 1.8089382  |
| C | 1.7833240 | -1.0248703 | -2.5347622 |
| C | 1.7505786 | 2.8597177  | -2.9457144 |
| H | 1.9369414 | 3.2052398  | -3.9498775 |
| H | 2.0207841 | 0.2483307  | 4.2667731  |
| C | 1.9858358 | -3.2002254 | 1.8587795  |
| H | 2.1304718 | -4.2684206 | 1.8419984  |
| C | 1.9954924 | -2.3990703 | -2.9674705 |
| H | 2.1416763 | -2.7245516 | -3.9849851 |

#### Free-base norcorrole

|   |            |            |            |
|---|------------|------------|------------|
| N | 1.7144615  | -0.0132479 | -0.0000178 |
| C | 2.2597758  | -1.2077326 | -0.0000305 |
| C | 2.6914494  | 0.9646455  | -0.0000198 |
| C | 3.7052271  | -1.0725094 | -0.0000410 |
| C | 3.9701805  | 0.2766725  | -0.0000237 |
| H | 4.4271082  | -1.8737306 | -0.0000680 |
| H | 4.9447287  | 0.7404625  | -0.0000098 |
| N | 0.0038355  | -1.8187918 | 0.0000054  |
| H | -0.2829471 | -0.8389987 | 0.0000197  |
| N | -1.7144615 | 0.0132479  | 0.0000119  |
| N | -0.0038355 | 1.8187918  | -0.0000001 |
| H | 0.2829470  | 0.8389987  | -0.0000202 |
| C | -0.9650363 | -2.7659511 | 0.0000195  |
| C | -2.2597758 | 1.2077326  | -0.0000009 |
| C | 0.9650363  | 2.7659511  | 0.0000110  |
| C | 1.2532163  | -2.2997280 | -0.0000180 |
| C | -2.6914494 | -0.9646455 | 0.0000043  |
| C | -1.2532163 | 2.2997280  | 0.0000178  |
| C | -0.2650645 | -3.9976949 | 0.0000026  |
| C | -3.7052271 | 1.0725094  | -0.0000166 |
| C | 0.2650645  | 3.9976949  | 0.0000357  |
| C | 1.1165422  | -3.7048195 | 0.0000501  |
| C | -3.9701805 | -0.2766725 | -0.0000314 |
| C | -1.1165422 | 3.7048195  | 0.0000181  |
| H | -0.7033329 | -4.9826235 | -0.0000619 |
| H | -4.4271082 | 1.8737306  | -0.0000099 |
| H | 0.7033329  | 4.9826235  | 0.0000692  |
| H | 1.9166348  | -4.4262251 | 0.0001568  |
| H | -4.9447287 | -0.7404625 | -0.0000726 |
| H | -1.9166348 | 4.4262251  | -0.0000006 |
| C | -2.3278689 | -2.3078129 | 0.0000164  |
| C | 2.3278689  | 2.3078129  | -0.0000064 |
| H | -3.1120492 | -3.0549562 | 0.0000264  |
| H | 3.1120492  | 3.0549562  | -0.0000157 |
